# Supplementary material for: Enhancement of Long-Range Surface Plasmon Excitation, Dynamic Range and Figure of Merit Using a Dielectric Resonant Cavity
Source: PubMed Central journal article supplement (PMC6165055; doi:10.3390/s18092757), 2018-08-22
Supplement: sensors-18-02757-s001.pdf [file sensors-18-02757-s001.pdf]

# Enhancement of Long-Range Surface Plasmons Excitation, Dynamic Range and Figure of Merit Using Dielectric Resonant Cavity

Phitsini Suvarnaphaet <sup>†</sup> and Suejit Pechprasarn <sup>\*,†</sup>

College of Biomedical Engineering, Rangsit University, Pathum Thani 12000, Thailand; phitsini.s@rsu.ac.th

\* Correspondence: suejit.p@rsu.ac.th; Tel.: +66-2-997-2200 (ext. 1469)

† These authors contributed equally to this work.

In the study, gold has been chosen as the plasmonic layer of the SPR sensor for the reasons described in the main manuscript. Here, we have also quantified the performance of silver with refractive index  $0.056206 + 4.2776i$  [25] as follows.

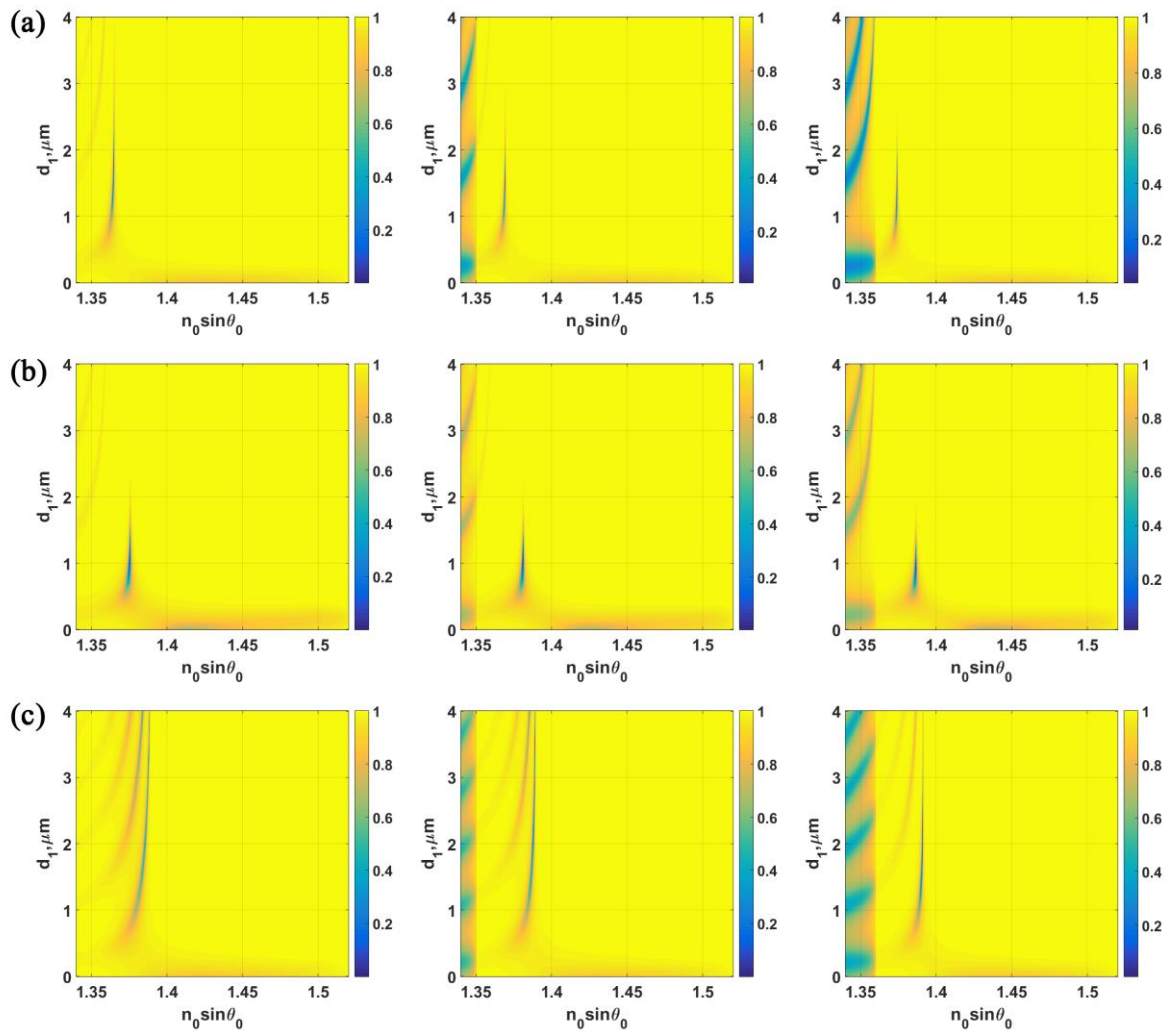

Figure S1. Cont.

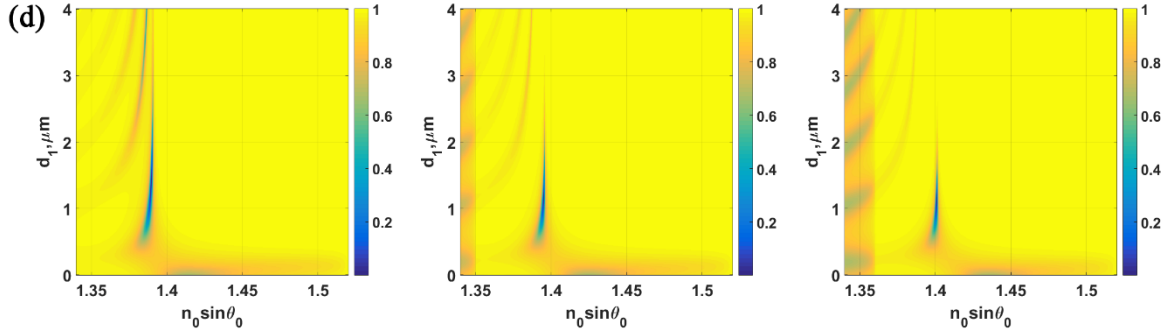

**Figure S1.**  $|r_p|^2$  responses for the following structure parameters using silver as the metal layer. (a)  $n_0 = 1.52$ ,  $n_1 = 1.3616$ ,  $n_2 = 0.056206 + 4.2776i$  with  $d_2 = 20$  nm. (b)  $n_0 = 1.52$ ,  $n_1 = 1.3616$ ,  $n_2 = 0.056206 + 4.2776i$  with  $d_2 = 30$  nm. (c)  $n_0 = 1.52$ ,  $n_1 = 1.39$ ,  $n_2 = 0.056206 + 4.2776i$  with  $d_2 = 20$  nm. (d)  $n_0 = 1.52$ ,  $n_1 = 1.39$ ,  $n_2 = 0.056206 + 4.2776i$  with  $d_2 = 30$  nm. Each column represents responses due to different sample refractive index,  $n_3 = 1.34$ ,  $1.35$  and  $1.36$  shown in left, middle and right columns, respectively. Note that  $\lambda = 633$  nm.

**Table S1.** The performance evaluation parameters for SPR excited by Kretschmann configuration, LRSP excited through evanescent wave coupling and LRSP excited by interferometric mode using silver.

| Structure Parameters $n_1$ , $d_1$ , $d_2$ (in nm) | Dynamic Range (D) | $n_0 \sin \theta_0$ at Lower D Limit | $n_0 \sin \theta_0$ at Upper D Limit | Sensitivity (S) | FWHM at $ r_p ^2 = 0$ | $n_0 \sin \theta_0$ Where the FWHM Calculated | FoM      |
|----------------------------------------------------|-------------------|--------------------------------------|--------------------------------------|-----------------|-----------------------|-----------------------------------------------|----------|
| <b>Kretschmann Configuration</b>                   |                   |                                      |                                      |                 |                       |                                               |          |
| 1.5200, 0, 55                                      | 1.3400–1.4355     | 1.4089                               | 1.5192                               | 1.1550          | 0.0083                | 1.4111                                        | 139.1535 |
| <b>LRSP excited by evanescent wave coupling</b>    |                   |                                      |                                      |                 |                       |                                               |          |
| 1.3400, 930, 30                                    | 1.3400–1.3800     | 1.3638                               | 1.3851                               | 0.5325          | 0.0012                | 1.3643                                        | 443.7500 |
| 1.3400, 660, 50                                    | 1.3400–1.4105     | 1.3851                               | 1.4083                               | 0.3291          | 0.0034                | 1.3861                                        | 96.7877  |
| 1.3400, 510, 78                                    | 1.3400–1.4500     | 1.4010                               | 1.4140                               | 0.1182          | 0.0072                | 1.4030                                        | 16.4141  |
| 1.3400, 420, 100                                   | 1.3400–1.3470     | 1.4070                               | 1.4200                               | 1.8571          | 0.0162                | 1.4113                                        | 114.6384 |
| 1.3400, 360, 92                                    | 1.3400–1.3540     | 1.4080                               | 1.4280                               | 1.4286          | 0.0179                | 1.4111                                        | 79.8085  |
| 1.3400, 310, 86                                    | 1.3400–1.3592     | 1.4084                               | 1.4397                               | 1.6302          | 0.0171                | 1.4112                                        | 95.3338  |
| <b>LRSP excited by interferometric mode</b>        |                   |                                      |                                      |                 |                       |                                               |          |
| 1.3616, 500, 61                                    | 1.3400–1.4500     | 1.4015                               | 1.4039                               | 0.0218          | 0.0056                | 1.4032                                        | 3.8961   |
| 1.3616, 1000, 32                                   | 1.3400–1.3796     | 1.3773                               | 1.3992                               | 0.5530          | 0.0014                | 1.3776                                        | 395.0216 |
| 1.3616, 1500, 20                                   | 1.3400–1.3681     | 1.3643                               | 1.3683                               | 0.1423          | 0.0006                | 1.3645                                        | 237.2479 |
| 1.3616, 500, 60                                    | 1.3400–1.4500     | 1.4010                               | 1.4390                               | 0.3455          | 0.0055                | 1.4026                                        | 62.8099  |
| 1.3900, 500, 50                                    | 1.3400–1.4500     | 1.4012                               | 1.4649                               | 0.5791          | 0.0060                | 1.4028                                        | 96.5152  |
| 1.3900, 1000, 35                                   | 1.3400–1.3864     | 1.3922                               | 1.4224                               | 0.6509          | 0.0026                | 1.3929                                        | 250.3316 |
| 1.3900, 1500, 29                                   | 1.3400–1.3563     | 1.3886                               | 1.3978                               | 0.5644          | 0.0016                | 1.3890                                        | 352.7607 |
| 1.3900, 2000, 26                                   | 1.3400–1.3511     | 1.3877                               | 1.3924                               | 0.4234          | 0.0011                | 1.3879                                        | 384.9304 |
| 1.3900, 2500, 25                                   | 1.3400–1.3477     | 1.3879                               | 1.3904                               | 0.3247          | 0.0008                | 1.3881                                        | 405.8442 |
| 1.3900, 3000, 25                                   | 1.3400–1.3448     | 1.3884                               | 1.3897                               | 0.2708          | 0.0006                | 1.3884                                        | 451.3889 |
| 1.3900, 3500, 25                                   | 1.3400–1.3431     | 1.3888                               | 1.3893                               | 0.1613          | 0.0005                | 1.3888                                        | 322.5806 |
| 1.3900, 4000, 25                                   | 1.3400–1.3423     | 1.3890                               | 1.3893                               | 0.1304          | 0.0003                | 1.3890                                        | 434.7826 |
| 1.3900, 500, 54                                    | 1.3400–1.4500     | 1.4033                               | 1.4671                               | 0.5800          | 0.0057                | 1.4048                                        | 101.7544 |
| 1.3900, 1000, 30                                   | 1.3400–1.4093     | 1.3879                               | 1.4277                               | 0.5743          | 0.0026                | 1.3884                                        | 220.8902 |
| 1.3900, 500, 45                                    | 1.4152–1.4500     | 1.4491                               | 1.4617                               | 0.3621          | 0.0059                | 1.3994                                        | 61.3676  |
| 1.3900, 500, 48                                    | 1.3400–1.4500     | 1.4001                               | 1.4638                               | 0.5791          | 0.0060                | 1.4015                                        | 96.5152  |

Other wavelengths for SPR excitation in the near-infrared region, i.e., 785 nm and 1024 nm are also presented in Figure S2 and Figure S3, respectively, and the sensing performance is summarized in Table S2 and Table S3.

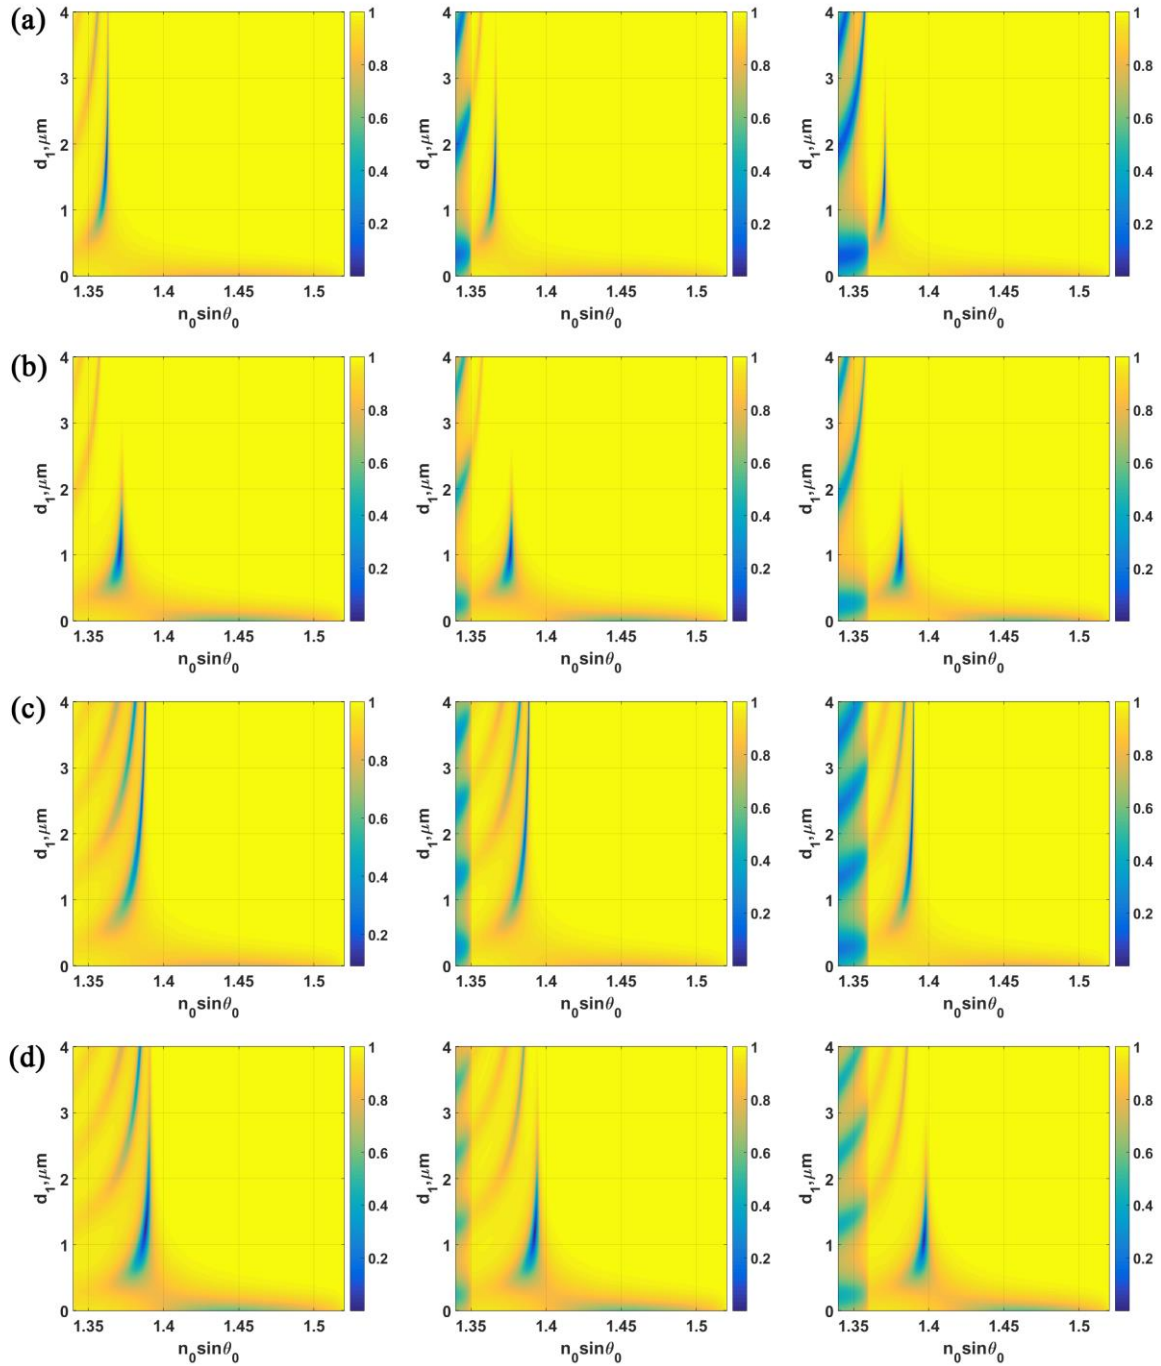

**Figure S2.**  $|r_p|^2$  responses for the following structure parameters using  $\lambda = 785$  nm. (a)  $n_0 = 1.52$ ,  $n_1 = 1.3616$ ,  $n_2 = 0.18344 + 3.4332i$  with  $d_2 = 20$  nm. (b)  $n_0 = 1.52$ ,  $n_1 = 1.3616$ ,  $n_2 = 0.18344 + 3.4332i$  with  $d_2 = 30$  nm. (c)  $n_0 = 1.52$ ,  $n_1 = 1.39$ ,  $n_2 = 0.18344 + 3.4332i$  with  $d_2 = 20$  nm. (d)  $n_0 = 1.52$ ,  $n_1 = 1.39$ ,  $n_2 = 0.18344 + 3.4332i$  with  $d_2 = 30$  nm. Each column represents responses due to different sample refractive index,  $n_3 = 1.34$ ,  $1.35$  and  $1.36$  shown in left, middle and right columns, respectively.

**Table S2.** The performance evaluation parameters for SPR excited by Kretschmann configuration, LRSPP excited through evanescent wave coupling and LRSPP excited by interferometric mode using  $\lambda = 785$  nm.

| Structure Parameters $n_1, d_1, d_2$ (in nm)     | Dynamic Range (D) | $nosin\theta_0$ at Lower D Limit | $nosin\theta_0$ at Upper D Limit | Sensitivity (S) | FWHM at $ r_p ^2 = 0$ | $nosin\theta_0$ Where the FWHM Calculated | FoM      |
|--------------------------------------------------|-------------------|----------------------------------|----------------------------------|-----------------|-----------------------|-------------------------------------------|----------|
| <b>Kretschmann Configuration</b>                 |                   |                                  |                                  |                 |                       |                                           |          |
| 1.5200, 0, 48                                    | 1.3400–1.4134     | 1.4361                           | 1.5171                           | 1.1035          | 0.0543                | 1.4480                                    | 20.3231  |
| <b>LRSPP excited by evanescent wave coupling</b> |                   |                                  |                                  |                 |                       |                                           |          |
| 1.3400, 930, 32                                  | 1.3400–1.3772     | 1.3609                           | 1.3837                           | 0.6129          | 0.0040                | 1.3620                                    | 153.2258 |
| 1.3400, 660, 47                                  | 1.3400–1.4134     | 1.3787                           | 1.4196                           | 0.5572          | 0.0097                | 1.3814                                    | 57.4454  |
| 1.3400, 510, 40                                  | 1.3400–1.4496     | 1.3958                           | 1.4496                           | 0.4909          | 0.0183                | 1.4010                                    | 26.8238  |
| 1.3400, 420, 80                                  | 1.3400–1.4500     | 1.4131                           | 1.4627                           | 0.4509          | 0.0294                | 1.4214                                    | 15.3370  |
| 1.3400, 360, 90                                  | 1.3400–1.4500     | 1.4212                           | 1.4730                           | 0.4709          | 0.0509                | 1.4322                                    | 9.2517   |
| 1.3400, 310, 130                                 | 1.3400–1.4500     | 1.4420                           | 1.4869                           | 0.4082          | 0.0741                | 1.4715                                    | 5.5085   |
| <b>LRSPP excited by interferometric mode</b>     |                   |                                  |                                  |                 |                       |                                           |          |
| 1.3616, 500, 62                                  | 1.3400–1.4500     | 1.4070                           | 1.4684                           | 0.5582          | 0.0192                | 1.4124                                    | 29.0720  |
| 1.3616, 1000, 33                                 | 1.3400–1.3821     | 1.3735                           | 1.3979                           | 0.5796          | 0.0046                | 1.3747                                    | 125.9940 |
| 1.3616, 1500, 23                                 | 1.3400–1.3641     | 1.3638                           | 1.3760                           | 0.5062          | 0.0022                | 1.3643                                    | 230.1018 |
| 1.3616, 500, 60                                  | 1.3400–1.4500     | 1.3926                           | 1.4584                           | 0.5982          | 0.0166                | 1.3964                                    | 36.0350  |
| 1.3900, 500, 50                                  | 1.3400–1.4500     | 1.4162                           | 1.4961                           | 0.7264          | 0.0208                | 1.4220                                    | 34.9213  |
| 1.3900, 1000, 35                                 | 1.3400–1.3959     | 1.3904                           | 1.4230                           | 0.5832          | 0.0070                | 1.3924                                    | 83.3120  |
| 1.3900, 1500, 28                                 | 1.3400–1.3691     | 1.3861                           | 1.3998                           | 0.4708          | 0.0039                | 1.3872                                    | 120.7155 |
| 1.3900, 2000, 25                                 | 1.3400–1.3599     | 1.3857                           | 1.3929                           | 0.3618          | 0.0025                | 1.3864                                    | 144.7236 |
| 1.3900, 2500, 24                                 | 1.3400–1.3535     | 1.3866                           | 1.3902                           | 0.2667          | 0.0018                | 1.3870                                    | 148.1481 |
| 1.3900, 3000, 23                                 | 1.3400–1.3518     | 1.3872                           | 1.3895                           | 0.1949          | 0.0012                | 1.3873                                    | 162.4294 |
| 1.3900, 3500, 22                                 | 1.3400–1.3523     | 1.3875                           | 1.3893                           | 0.1463          | 0.0009                | 1.3877                                    | 162.6016 |
| 1.3900, 4000, 23                                 | 1.3400–1.3468     | 1.3881                           | 1.3890                           | 0.1324          | 0.0007                | 1.3882                                    | 189.0756 |
| 1.3900, 500, 70                                  | 1.3400–1.4369     | 1.4282                           | 1.4930                           | 0.6687          | 0.0191                | 1.4323                                    | 35.0121  |
| 1.3900, 1000, 30                                 | 1.3400–1.4151     | 1.3849                           | 1.4269                           | 0.5593          | 0.0067                | 1.3864                                    | 83.4708  |
| 1.3900, 500, 50                                  | 1.3400–1.4500     | 1.4044                           | 1.4781                           | 0.6700          | 0.0195                | 1.4094                                    | 34.3590  |
| 1.3900, 500, 48                                  | 1.3400–1.4500     | 1.4023                           | 1.4753                           | 0.6636          | 0.0188                | 1.4066                                    | 35.2998  |

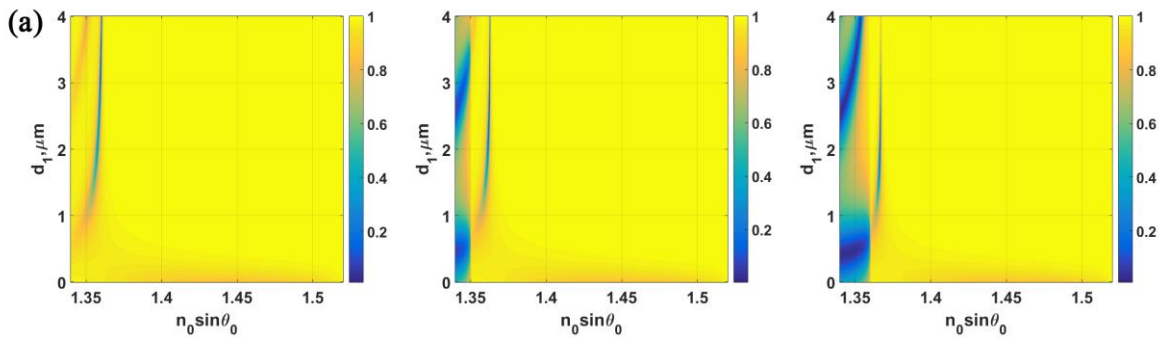

**Figure S3.** Cont.

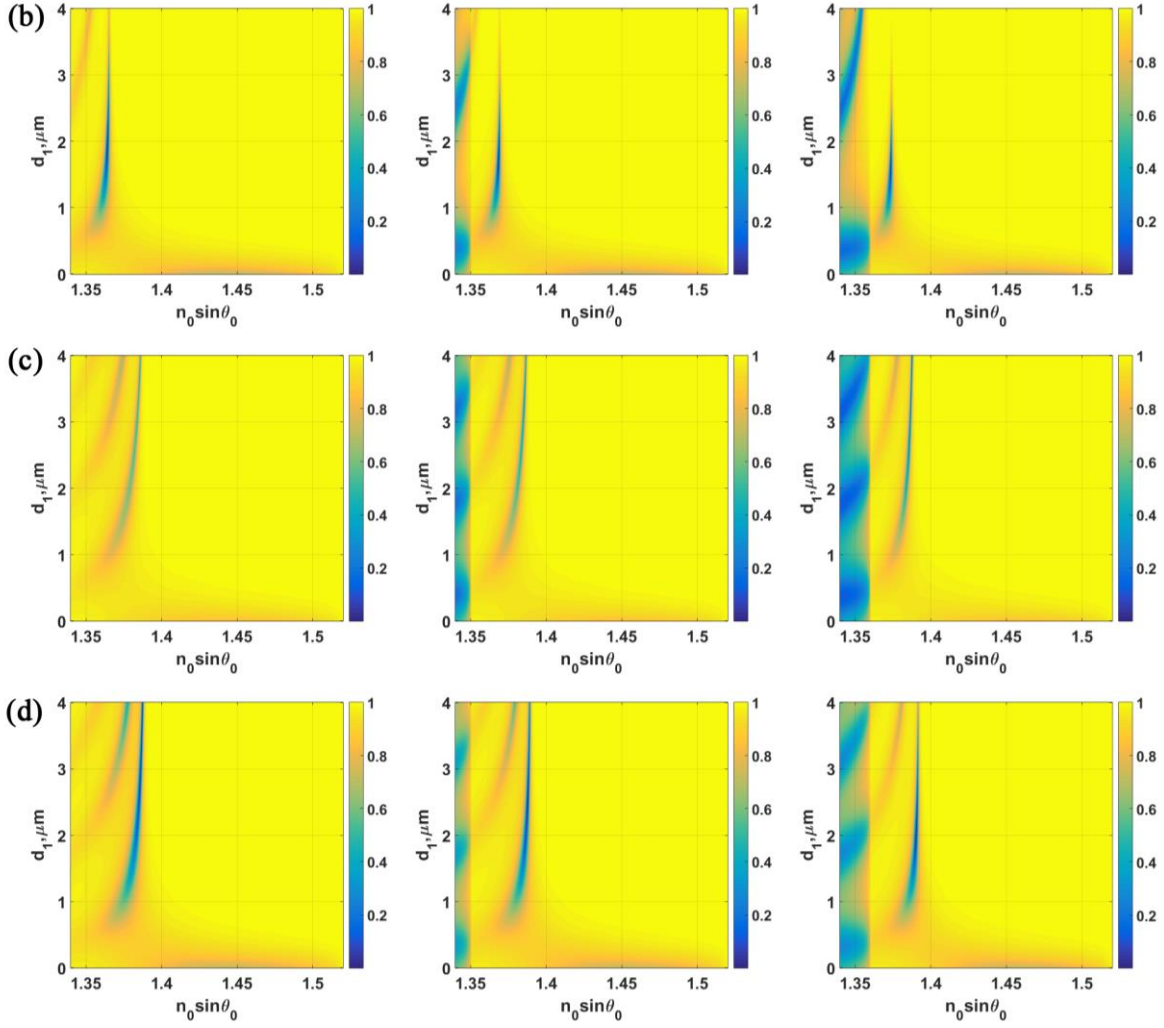

**Figure S3.**  $|r_p|^2$  responses for the following structure parameters using  $\lambda = 1024$  nm. (a)  $n_0 = 1.52$ ,  $n_1 = 1.3616$ ,  $n_2 = 0.18344 + 3.4332i$  with  $d_2 = 20$  nm. (b)  $n_0 = 1.52$ ,  $n_1 = 1.3616$ ,  $n_2 = 0.18344 + 3.4332i$  with  $d_2 = 30$  nm. (c)  $n_0 = 1.52$ ,  $n_1 = 1.39$ ,  $n_2 = 0.18344 + 3.4332i$  with  $d_2 = 20$  nm. (d)  $n_0 = 1.52$ ,  $n_1 = 1.39$ ,  $n_2 = 0.18344 + 3.4332i$  with  $d_2 = 30$  nm. Each column represents responses due to different sample refractive index,  $n_3 = 1.34$ ,  $1.35$  and  $1.36$  shown in left, middle and right columns, respectively.

**Table S3.** The performance evaluation parameters for SPR excited by Kretschmann configuration, LRSPP excited through evanescent wave coupling and LRSPP excited by interferometric mode using  $\lambda = 1024$  nm.

| Structure Parameters $n_1, d_1, d_2$ (in nm)     | Dynamic Range (D) | $n_0 \sin \theta_0$ at Lower D Limit | $n_0 \sin \theta_0$ at Upper D Limit | Sensitivity (S) | FWHM at $ r_p ^2 = 0$ | $n_0 \sin \theta_0$ Where the FWHM Calculated | FoM     |
|--------------------------------------------------|-------------------|--------------------------------------|--------------------------------------|-----------------|-----------------------|-----------------------------------------------|---------|
| <b>Kretschmann Configuration</b>                 |                   |                                      |                                      |                 |                       |                                               |         |
| 1.5200, 0, 78                                    | 1.3979            | 1.4394                               | 1.5141                               | 1.2902          | 0.0470                | 1.4511                                        | 27.4501 |
| <b>LRSPP excited by evanescent wave coupling</b> |                   |                                      |                                      |                 |                       |                                               |         |
| 1.3400, 930, 60                                  | 1.3974            | 1.3778                               | 1.4104                               | 0.5679          | 0.0082                | 1.3801                                        | 69.2615 |
| 1.3400, 660, 80                                  | 1.4498            | 1.3949                               | 1.4498                               | 0.5000          | 0.0184                | 1.4001                                        | 27.1739 |
| 1.3400, 510, 110                                 | 1.4500            | 1.4167                               | 1.4673                               | 0.4600          | 0.0348                | 1.4261                                        | 13.2184 |
| 1.3400, 420, 100                                 | 1.4500            | 1.4135                               | 1.4736                               | 0.5464          | 0.0425                | 1.4232                                        | 12.8556 |

Table S3. *Cont.*

| Structure Parameters $n_1, d_1, d_2$ (in nm) | Dynamic Range (D) | $nosin\theta$ at Lower D Limit | $nosin\theta_0$ at Upper D Limit | Sensitivity (S) | FWHM at $ r_p ^2 = 0$ | $nosin\theta_0$ Where the FWHM Calculated | FoM      |
|----------------------------------------------|-------------------|--------------------------------|----------------------------------|-----------------|-----------------------|-------------------------------------------|----------|
| <b>LRSP excited by interferometric mode</b>  |                   |                                |                                  |                 |                       |                                           |          |
| 1.3400, 360, 90                              | 1.4500            | 1.4530                         | 1.4770                           | 0.4715          | 0.0478                | 1.4246                                    | 9.8643   |
| 1.3616, 500, 95                              | 1.3400–1.4500     | 1.4181                         | 1.4856                           | 0.6136          | 0.0311                | 1.4264                                    | 19.7311  |
| 1.3616, 1000, 55                             | 1.3400–1.4048     | 1.3841                         | 1.4224                           | 0.5910          | 0.0079                | 1.3863                                    | 74.8164  |
| 1.3616, 1500, 23                             | 1.3400–1.3809     | 1.3667                         | 1.3898                           | 0.5648          | 0.0034                | 1.3675                                    | 166.1153 |
| 1.3616, 500, 100                             | 1.3400–1.4500     | 1.4217                         | 1.4879                           | 0.6018          | 0.0317                | 1.4302                                    | 18.9848  |
| 1.3900, 500, 90                              | 1.3400–1.4500     | 1.4248                         | 1.5076                           | 0.7527          | 0.0304                | 1.4327                                    | 24.7608  |
| 1.3900, 1000, 60                             | 1.3400–1.4059     | 1.4025                         | 1.4449                           | 0.6434          | 0.0104                | 1.4052                                    | 61.8653  |
| 1.3900, 1500, 40                             | 1.3400–1.3910     | 1.3866                         | 1.4143                           | 0.5431          | 0.0057                | 1.3882                                    | 95.2872  |
| 1.3900, 2000, 35                             | 1.3400–1.3721     | 1.3853                         | 1.3998                           | 0.4517          | 0.0038                | 1.3862                                    | 118.8719 |
| 1.3900, 2500, 38                             | 1.3400–1.3461     | 1.3888                         | 1.3915                           | 0.4426          | 0.0024                | 1.3891                                    | 184.4262 |
| 1.3900, 3000, 30                             | 1.3400–1.3605     | 1.3857                         | 1.3915                           | 0.2829          | 0.0021                | 1.3860                                    | 134.7271 |
| 1.3900, 3500, 30                             | 1.3400–1.3555     | 1.3865                         | 1.3900                           | 0.2258          | 0.0016                | 1.3870                                    | 141.1290 |
| 1.3900, 4000, 30                             | 1.3400–1.3512     | 1.3871                         | 1.3893                           | 0.1964          | 0.0012                | 1.3875                                    | 163.6905 |
| 1.3900, 500, 89                              | 1.3400–1.4500     | 1.4241                         | 1.5070                           | 0.7536          | 0.0304                | 1.4328                                    | 24.7907  |
| 1.3900, 1000, 55                             | 1.3400–1.4231     | 1.3973                         | 1.4484                           | 0.6149          | 0.0105                | 1.4003                                    | 58.5640  |
| 1.3900, 500, 80                              | 1.3400–1.4500     | 1.4172                         | 1.4995                           | 0.7482          | 0.0297                | 1.4248                                    | 25.1913  |
| 1.3900, 500, 100                             | 1.3400–1.4500     | 1.4323                         | 1.5124                           | 0.7282          | 0.0289                | 1.4392                                    | 25.1966  |
